# Supplementary material for: In situ growth of graphdiyne on arbitrary substrates with a controlled-release method
Source: Royal Society of Chemistry journal article supplement (doi:10.1039/c8cc03006e), 2018-01-01
Supplement: c8cc03006e1.pdf [file c8cc03006e1.pdf]

## Supplementary Information for

### In-situ growth of Graphdiyne on Arbitrary Substrates with a Controlled-release Method

Fuhua Zhao,<sup>a</sup> Ning Wang,<sup>\* a</sup> Mingjia Zhang,<sup>a</sup> András Sápi,<sup>b</sup> Jiaojiao Yu,<sup>a, c</sup> Xiaodong  
Li,<sup>a, b</sup> Weiwei Cui,<sup>d</sup> Ze Yang<sup>a</sup> and Changshui Huang<sup>\* a</sup>

<sup>a</sup> Qingdao Institute of Bioenergy and Bioprocess Technology, Chinese Academy of  
Sciences. No. 189 Songling Road, 266101, Qingdao, China.

E-mail: huangcs@qibebt.ac.cn

<sup>b</sup> Department of Applied and Environmental Chemistry, University of Szeged, 1  
Rerrich square, 6720, Szeged, Hungary

<sup>c</sup> University of Chinese Academy of Sciences, No. 19A Yuquan Road, 100049,  
Beijing, China.

<sup>d</sup> Department of Physics, Qingdao University, 266071, Qingdao, China.

## **Materials**

Unless otherwise stated, the reagents and solvents used in this work were commercially obtained and used without further purification.

### **Substrates pretreatment**

Si and SiO<sub>2</sub> wafers and glass slides were cut into slices about 1 cm<sup>2</sup>, and then pretreated by sonicating in 3M HCl and acetone and ethanol, respectively, for 15 min, dried under a flow of argon and plasma processed to get a fresh surface and used immediately for growing graphdiyne films.

### **Preparation of PVP/Cu(OAc)<sub>2</sub> solution and PVP/Cu(OAc)<sub>2</sub> film**

0.3 g of PVP and 0.1, 0.2, 0.3, 0.4 g of cupric acetate was dissolved in 20 mL deionized water, respectively, to get a series of slow-release solution with various Cu<sup>2+</sup> concentration. 15 μL of as prepared PVP/Cu(OAc)<sub>2</sub> solution was dropped on the prepared sheet substrates, followed by spinning at 3000 rpm to fabricate a PVP/Cu(OAc)<sub>2</sub> film. For the powder substrates, the substrates were immersed in PVP/Cu(OAc)<sub>2</sub> solution for 3 hours, then filtered and dried to form a PVP/Cu(OAc)<sub>2</sub> film.

### **Preparation of HEB precursor solution**

HEB was synthesized according to the reported synthetic route.<sup>1</sup>

### **Preparation of GDY on arbitrary substrate**

The substrates covered with PVP/Cu(OAc)<sub>2</sub> film was immersed into HEB solution with acetone and pyridine (v: v = 20: 1) as solvent, followed by keeping 3 days' standing in atmosphere environment at room temperature. Finally, bulk GDY was uniformly fabricated on the target substrates.

### **Characterization of Materials**

The morphologies of the materials were characterized by field emission SEM (HITACHI S-4800) equipped with an energy dispersive X-ray spectrometry. TEM and HRTEM images were obtained using TEM (JEOL 2011F and 2100F). FTIR was recorded on a Bruker VECTOR 22 spectrometer in the frequency range of 4000–500 cm<sup>-1</sup>. Raman spectra were recorded at the room temperature using a Thermo Scientific DXRxi system with a 532 nm laser. XPS analysis was performed by using VG Scientific ESCALab220i-XL X-ray photoelectron spectrometer with K $\alpha$  radiation as the excitation sources. XRD patterns were

recorded on X-ray powder diffractometer (D8 ADVANCE) with Cu K $\alpha$  radiation. The typical current–voltage (I–V) curves of as-prepared GDY film was recorded using a Keithley 4200 semiconductor characterization system and Signatone probe station.

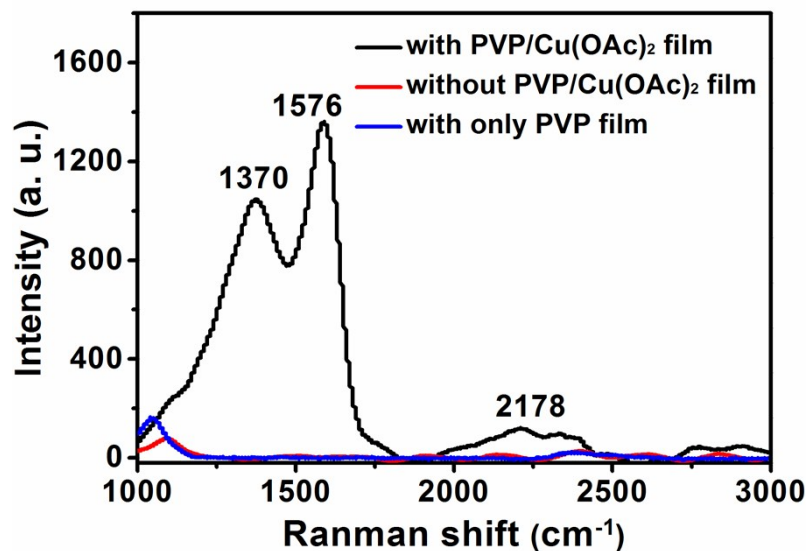

**Figure S1** Typical Raman spectra of glasses growing GDY with and without PVP/ copper(II) acetate film.

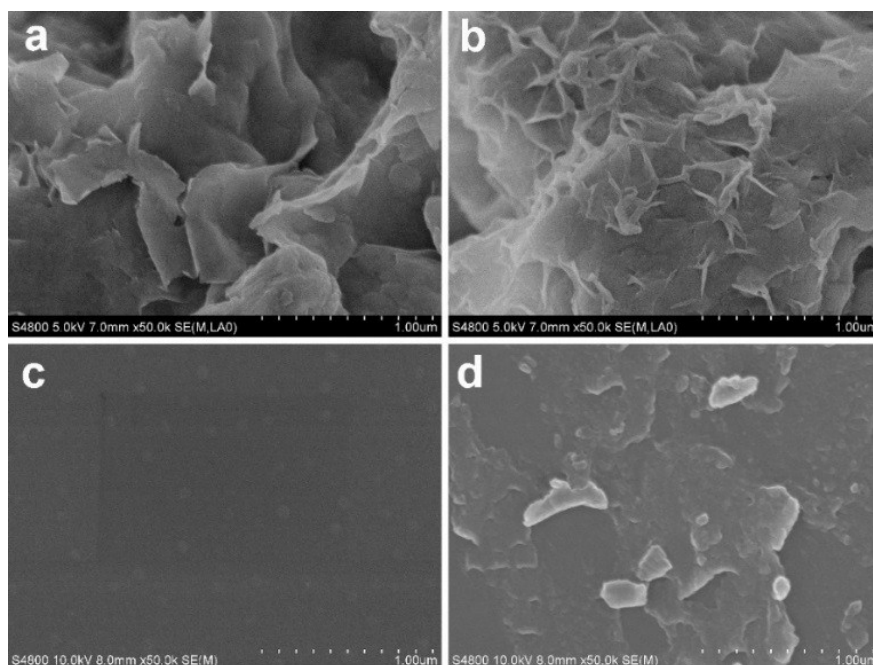

**Figure S2** SEM images of different substrates before and after the fabrication of GDY: a, b) on nano-layered montmorillonite, c, d) on ITO glass.

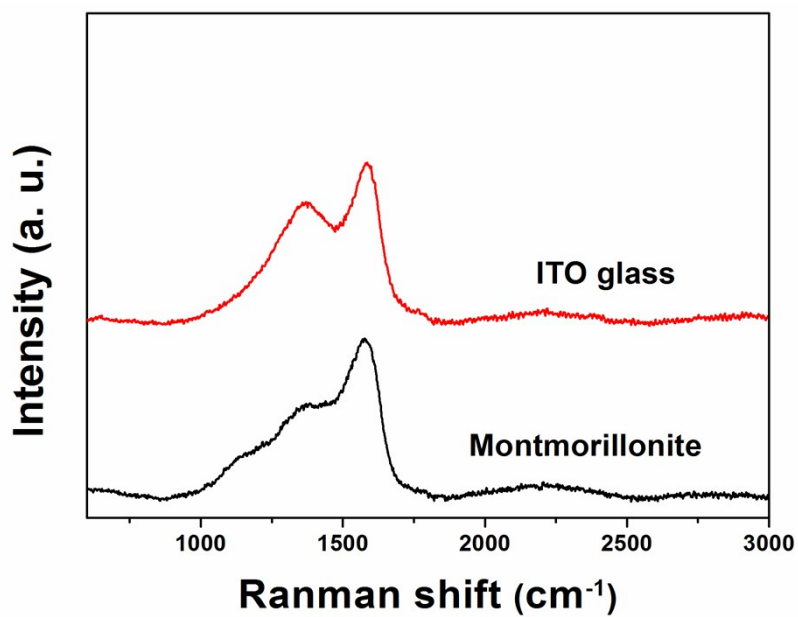

**Figure S3** Typical Raman spectra of GDY fabricated on ITO glass and montmorillonite substrates.

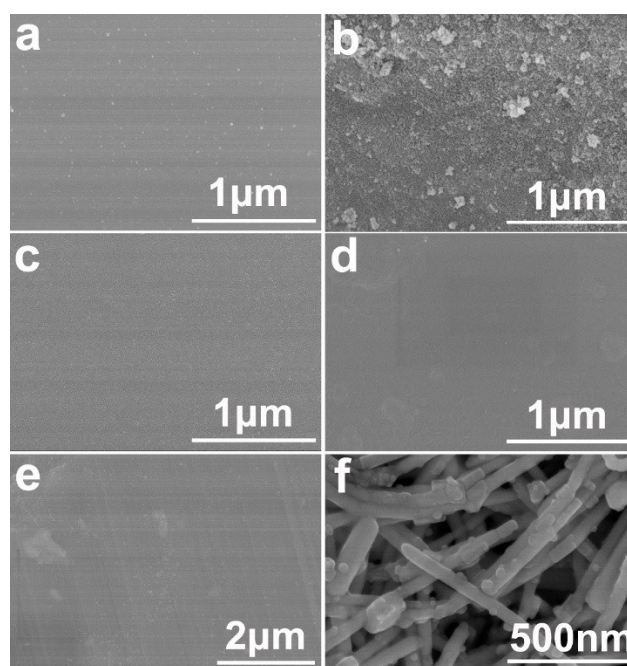

**Figure S4** SEM images of different substrates. a) glass sheets, b) macro-porous silica gel, c) silicon wafers, d) ZnO film, e) Al foil and f) Ag nanowires.

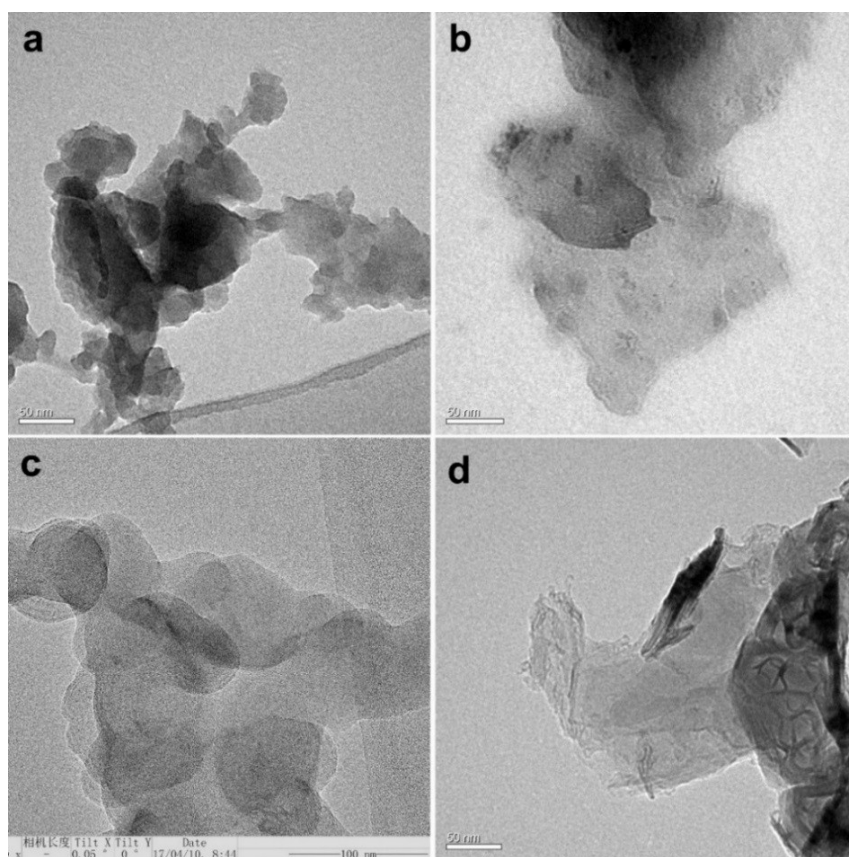

**Figure S5** TEM images of as-prepared GDY peeled from (a) glass sheet, (b) macro-porous silica gel, (c) silicon wafer and (d) ZnO film.

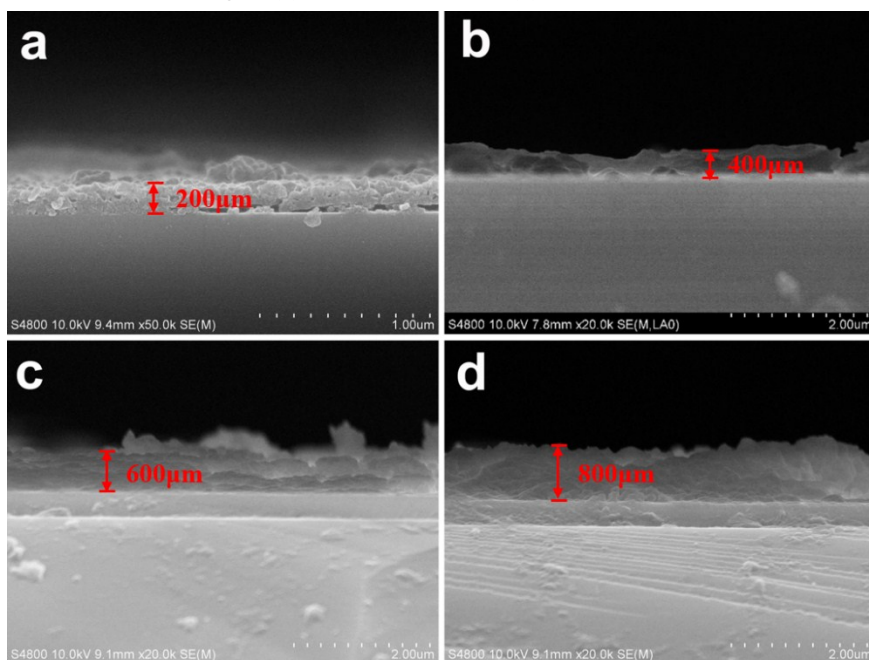

**Figure S6** Thickness measurement of GDY fabricated on SiO<sub>2</sub> wafer by SEM.

### Supplementary References

1. G. Li, Y. Li, H. Liu, Y. Guo, Y. Li and D. Zhu, *Chem. Commun.*, 2010, **46**, 3256-3258.
